# Supplementary material for: Incremental Value of Biventricular Strain in Patients with Severe Aortic Stenosis
Source: MDPI journal article supplement (doi:10.3390/jcdd11030090), 2024-03-13
Supplement: s1 [file s1]

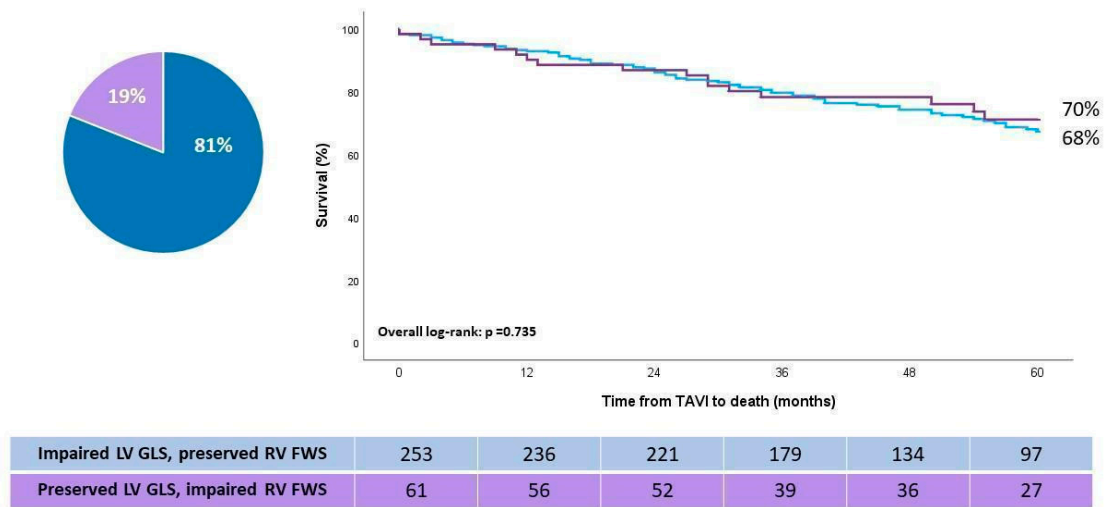

**Supplementary Figure S1.** Kaplan-Meier estimated survival curves for the single-ventricle impaired strain group according to LV GLS or RV FWS impairment.

LV GLS: Left ventricular global longitudinal strain; RV FWS: Right ventricular free wall strain; TAVI: transcatheter aortic valve implantation.

**Supplementary Table S1.** Baseline clinical and echocardiographic characteristics of the included and excluded patients.

|                                  | Included patients<br>n=712 | Excluded patients<br>n=319 | p- value |
|----------------------------------|----------------------------|----------------------------|----------|
| Age, years                       | 80 ( $\pm 7$ )             | 79 ( $\pm 7$ )             | 0.041    |
| Male sex, n (%)                  | 377 (53)                   | 177 (55)                   | 0.556    |
| BSA, m <sup>2</sup>              | 1.9 ( $\pm 0.2$ )          | 1.8 ( $\pm 0.2$ )          | 0.005    |
| Smoking, n (%)                   | 153 (23)                   | 65 (20)                    | 0.404    |
| Arterial hypertension, n (%)     | 527 (74)                   | 241 (75)                   | 0.879    |
| Diabetes mellitus, n (%)         | 201 (28)                   | 99 (31)                    | 0.557    |
| Dyslipidemia, n (%)              | 447 (63)                   | 213 (67)                   | 0.579    |
| Coronary artery disease, n (%)   | 421 (59)                   | 194 (61)                   | 0.787    |
| Peripheral artery disease, n (%) | 208 (29)                   | 85 (27)                    | 0.237    |
| Chronic kidney disease, n (%)    | 52 (7)                     | 56 (8)                     | 0.394    |
| Atrial fibrillation, n (%)       | 169 (24)                   | 94 (29)                    | 0.066    |
| NYHA class III-IV, n (%)         | 403 (57)                   | 204 (64)                   | 0.055    |

|                                                                                                                                                                                                                                                                                       |              |                          |       |
|---------------------------------------------------------------------------------------------------------------------------------------------------------------------------------------------------------------------------------------------------------------------------------------|--------------|--------------------------|-------|
| LV end– diastolic volume index, mL                                                                                                                                                                                                                                                    | 55 (±24)     | 54 (±24)/102 missings    | 0.399 |
| LV end– systolic volume index, mL                                                                                                                                                                                                                                                     | 26 (±19)     | 27(±18)/102 missings     | 0.635 |
| LV ejection fraction, %                                                                                                                                                                                                                                                               | 55 (±14)     | 54 (±14)/102 missings    | 0.023 |
| LV mass index, g/m <sup>2</sup>                                                                                                                                                                                                                                                       | 125 (±38)    | 129 (±42)                | 0.895 |
| LV global longitudinal strain, %                                                                                                                                                                                                                                                      | 13 (±4)      | 13 (±4)/194 missings     | 0.738 |
| Left atrial volume index, mL/m <sup>2</sup>                                                                                                                                                                                                                                           | 41 (31 – 53) | 41 (31 - 52)/99 missings | 0.293 |
| E/e' ratio                                                                                                                                                                                                                                                                            | 17 (12 – 24) | 17 (12 - 24)/98 missings | 0.463 |
| Severe mitral regurgitation                                                                                                                                                                                                                                                           | 40 (6)       | 8 (3)                    | 0.053 |
| Aortic valve area, cm <sup>2</sup>                                                                                                                                                                                                                                                    | 0.8 (±0.3)   | 0.8 (±0.3)               | 0.060 |
| Severe aortic regurgitation                                                                                                                                                                                                                                                           | 17 (2)       | 7 (2)                    | 0.248 |
| TAPSE, mm                                                                                                                                                                                                                                                                             | 19 (±5)      | 19 (±5)/103 missings     | 0.865 |
| RV free wall strain, %                                                                                                                                                                                                                                                                | 22 (±7)      | 20 (±6)/202 missings     | 0.080 |
| PASP, mmHg                                                                                                                                                                                                                                                                            | 35 (29 – 44) | 35 (29 - 44)/97 missings | 0.916 |
| Severe tricuspid regurgitation                                                                                                                                                                                                                                                        | 33 (5)       | 11 (3)                   | 0.892 |
| <p>Values are expressed as mean ±SD, median (IQR) or n (%).</p> <p>Abbreviations: BSA: Body Surface Area; NYHA: New York Heart Association; LV: left ventricle, TAPSE: tricuspid annular plane systolic excursion; RV: right ventricle; PASP: pulmonary artery systolic pressure.</p> |              |                          |       |
